# Supplementary material for: Системный подход к анализу сложных систем и процессов на основе триад
Source: Royal Society of Chemistry journal article supplement (doi:10.1039/d3cp03127f), 2007-01-01
Supplement: d3cp03127f1.pdf [file d3cp03127f1.pdf]

## Electronic Supplementary Information

### Electron delocalization in defected graphene and its ability to the tetrel bonds formation

Ekaterina V. Bartashevich,<sup>\*a</sup> Elena O. Levina<sup>a,b</sup>, Irina D. Yushina,<sup>a</sup> Sergey A. Sozykin,<sup>a</sup> and Vladimir G. Tsirelson<sup>a,c</sup>

*a. South Ural State University, 454080 Chelyabinsk, Russia.*

*b. N.S. Kurnakov Institute of General and Inorganic Chemistry, Russian Academy of Sciences, 119071 Moscow, Russia.*

*c. D.I. Mendeleev University of Chemical Technology, 125047 Moscow, Russia.*

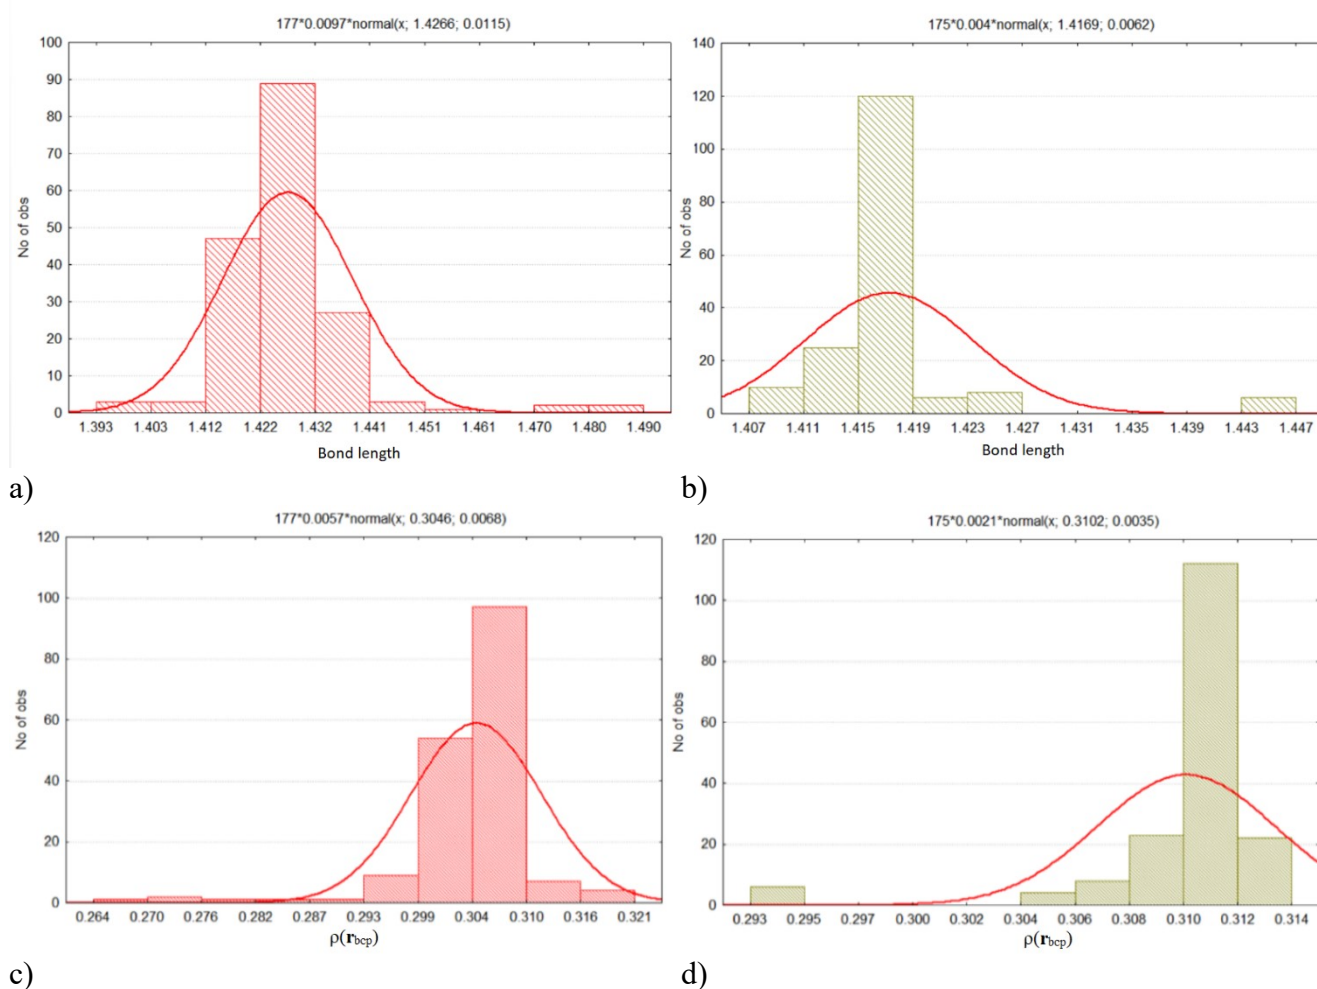

**Figure S1.** Histograms showing the C<sub>g</sub>-C<sub>g</sub> bond length distribution and distribution of electron density at bcp for C<sub>g</sub>-C<sub>g</sub> bonds a,c) in graphene with a vacancy b,d) in graphene with Si-defect

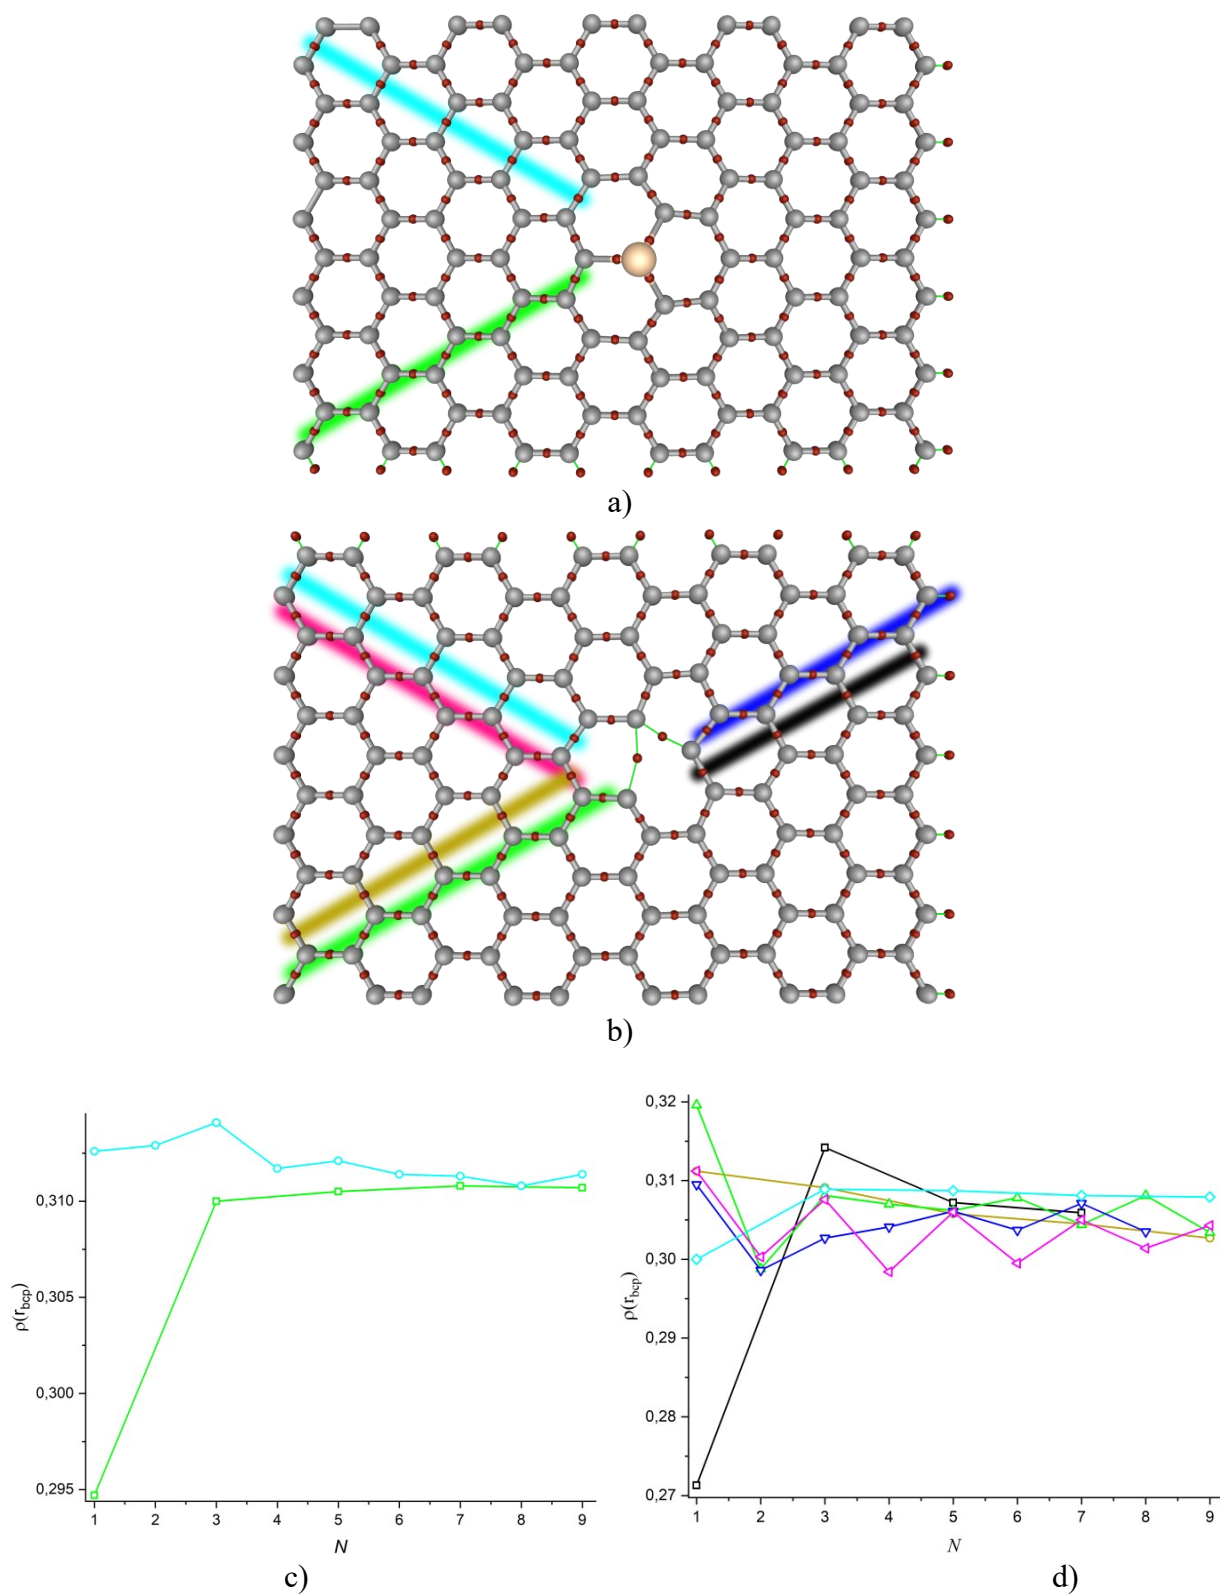

**Figure S2.** Scheme of directions in defected graphene for analysis of defect influence on electron density distribution at bcp of the ordinary  $C_g-C_g$  bonds a) in Si-defected layer and b) in vacancy-defected graphene. Electron density at bond critical points moving away from a defect in various directions c) in Si-defected layer and d) in vacancy-defected graphene

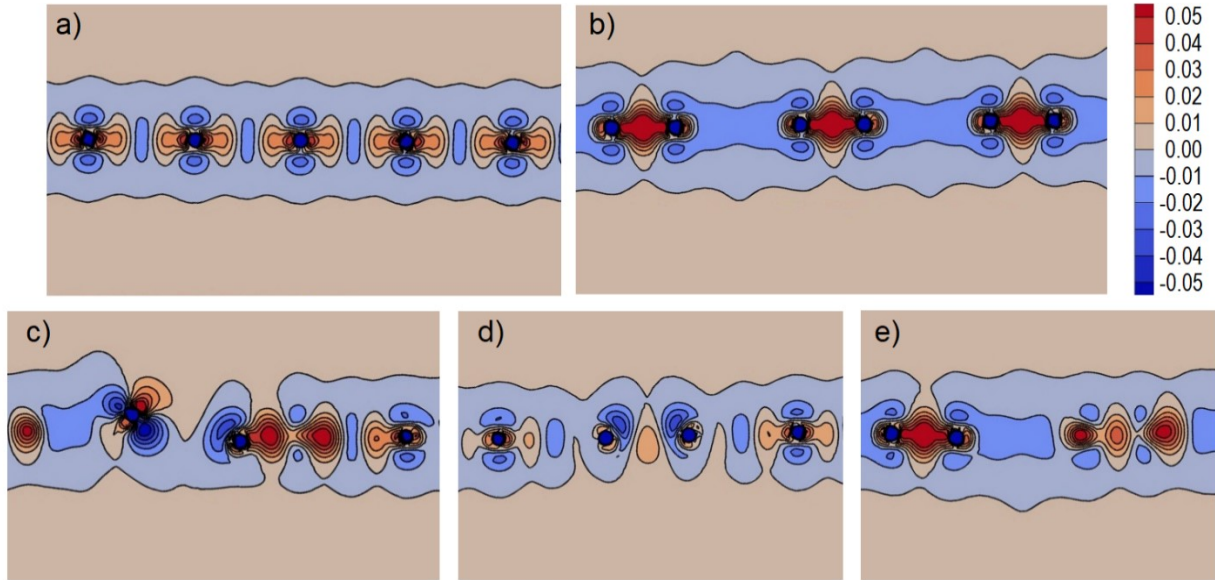

**Figure S3.** Deformation density,  $\delta\rho(\mathbf{r})$ , in planes perpendicular to graphene layer for the defect-free graphene (a,b) and for the graphene with a vacancy (c,d,e). Planes b) and e) contain  $C_g-C_g$  covalent bonds, which in the case of defected graphene belongs to the vacancy edge (i.e.  $C_g^2-C_g^3$  bond, see Fig. 3a). Planes c), d) contain  $C_g^1\dots C_g^5$  and  $C_g^5\dots C_g^9$  noncovalent bonds in the vacancy region (Fig. 3a), while plane (a) corresponds to the similar plane in defect-free graphene.

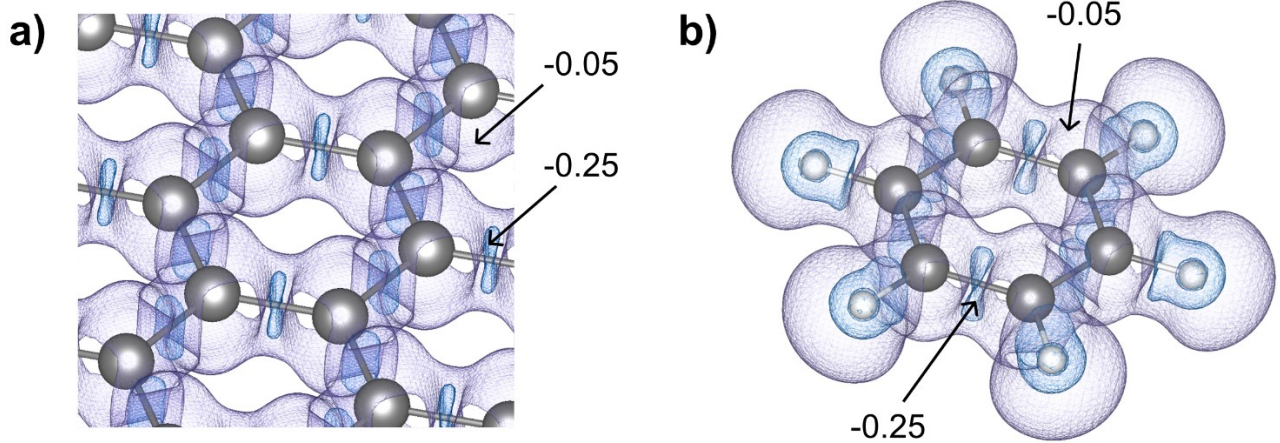

**Figure S4.** The fermionic potential,  $v_f(r)$ , distribution in the defect-free graphene (a) and benzene molecule (b). The values of the depicted isosurfaces are given in the a.u.

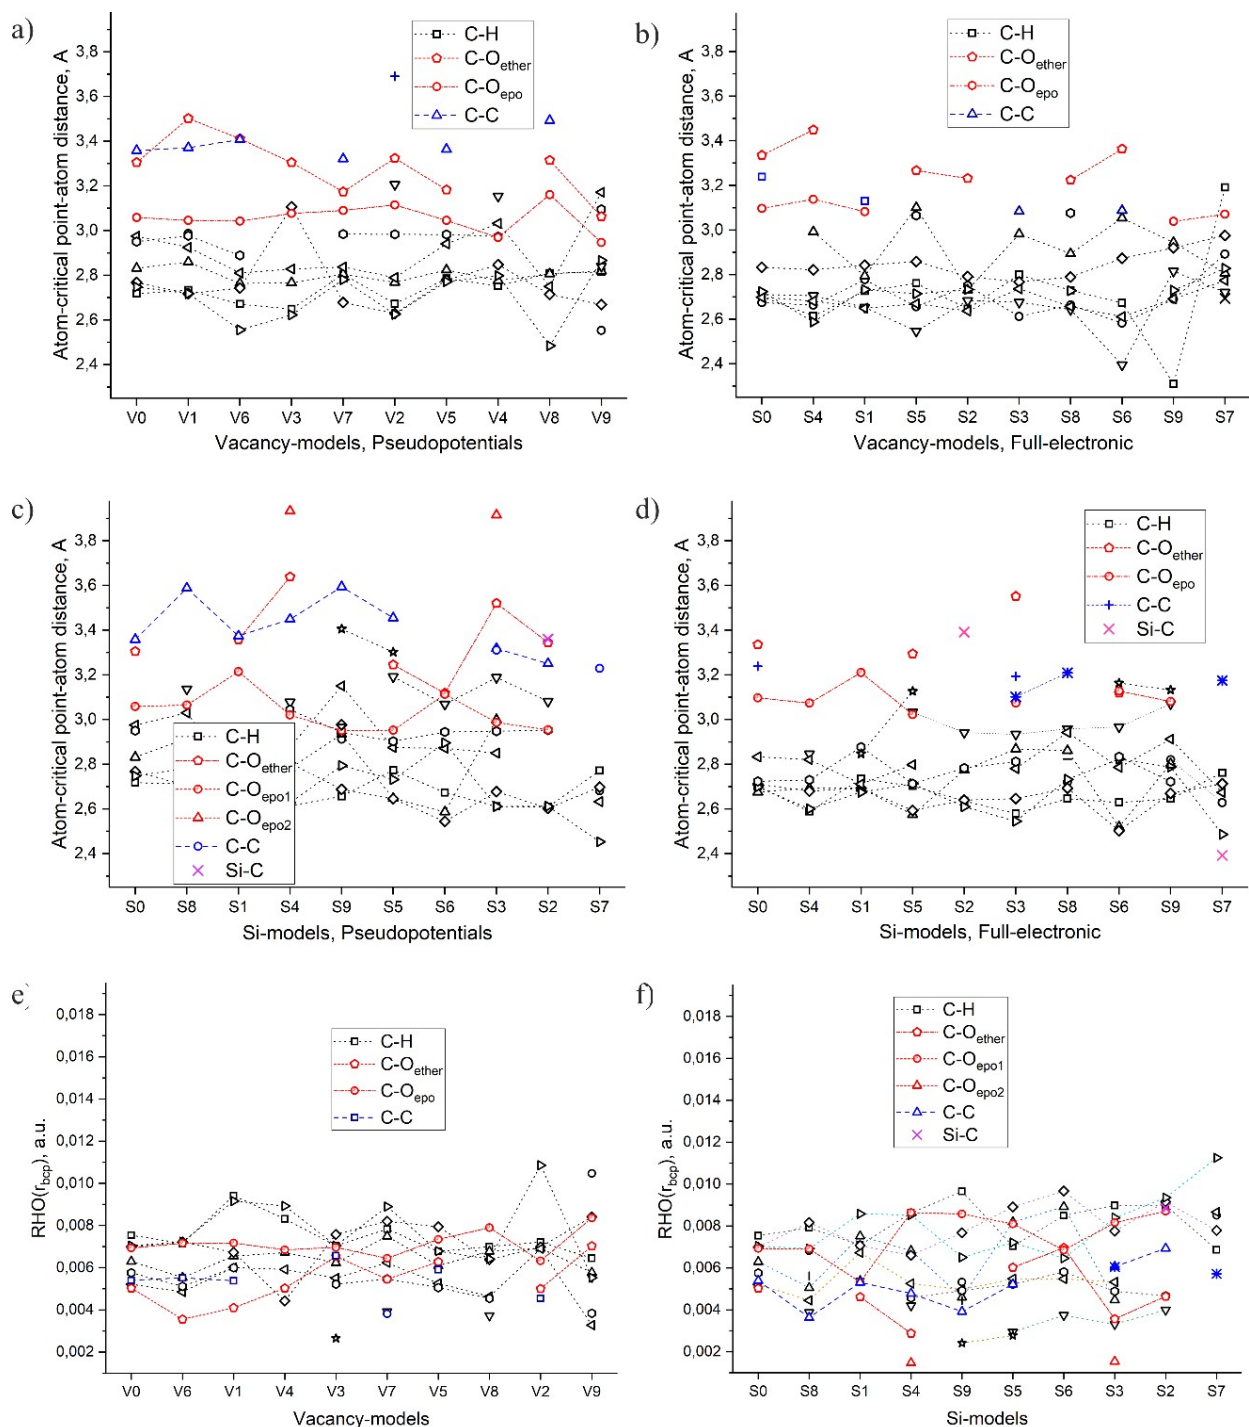

**Figure S5.** Interatomic distances for noncovalent bonds in the systems ranked by  $E_{\text{int}}$  “DGEBA – vacancy-defected graphene”: a) pseudopotential basis sets; b) full-electron basis sets; “DGEBA – Si-defected graphene”: c) pseudopotential basis sets; d) full-electron basis sets. Electron density at bcp of noncovalent bonds calculated in pseudopotential basis sets: e) vacancy-defected models; f) Si-defected models



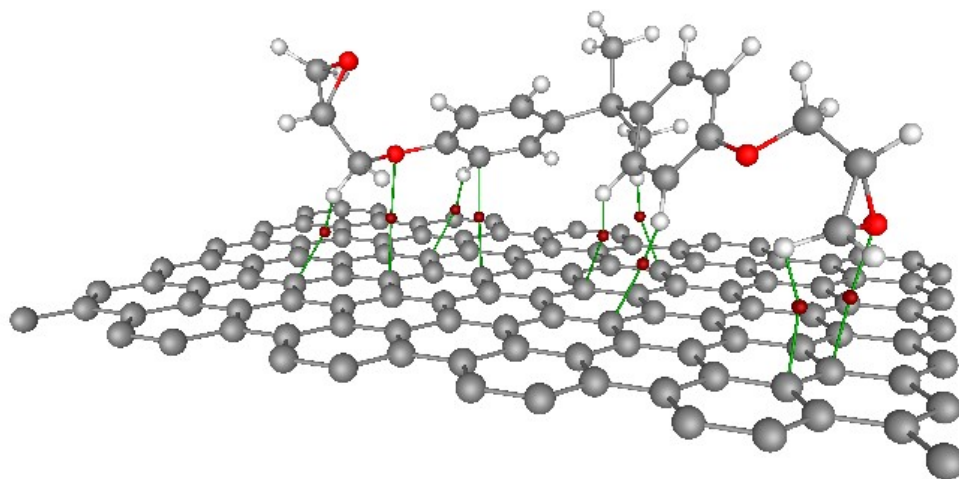

a

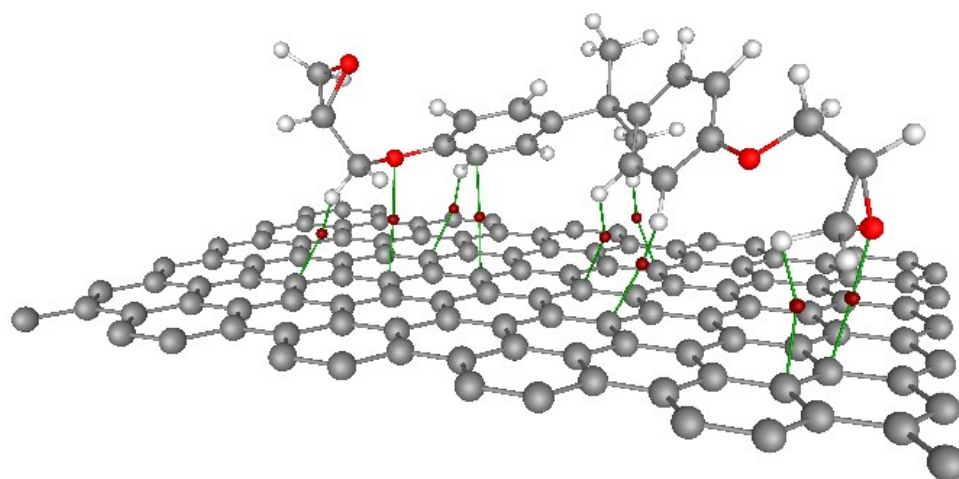

b

**Figure S6.** Bond paths for interactions of DGEBA and defect-free graphene  $C_g$  atoms according to a) full-electron computation; b) pseudopotential computation

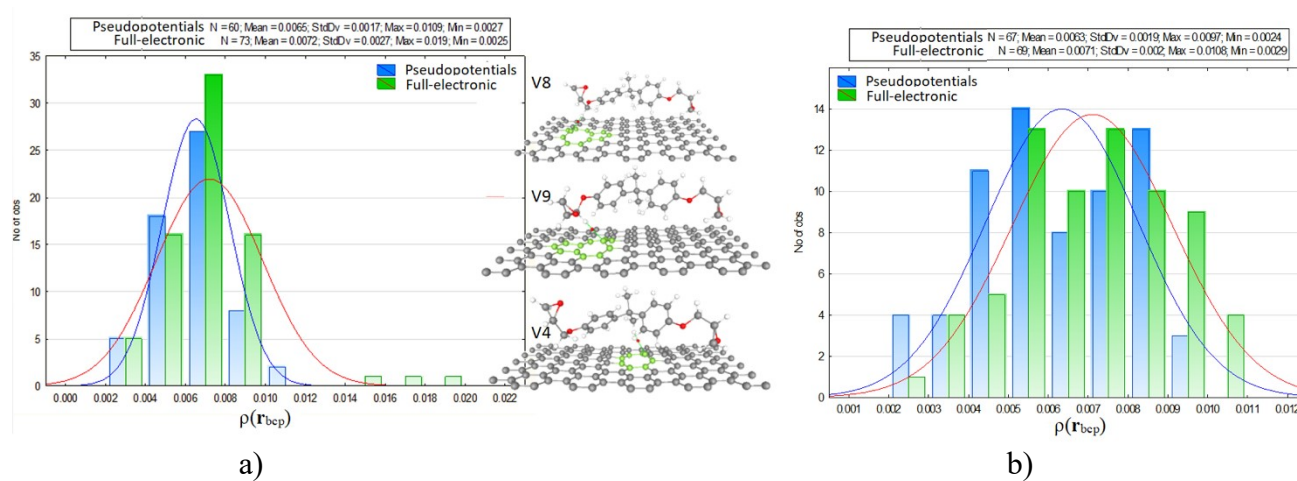

a)

b)

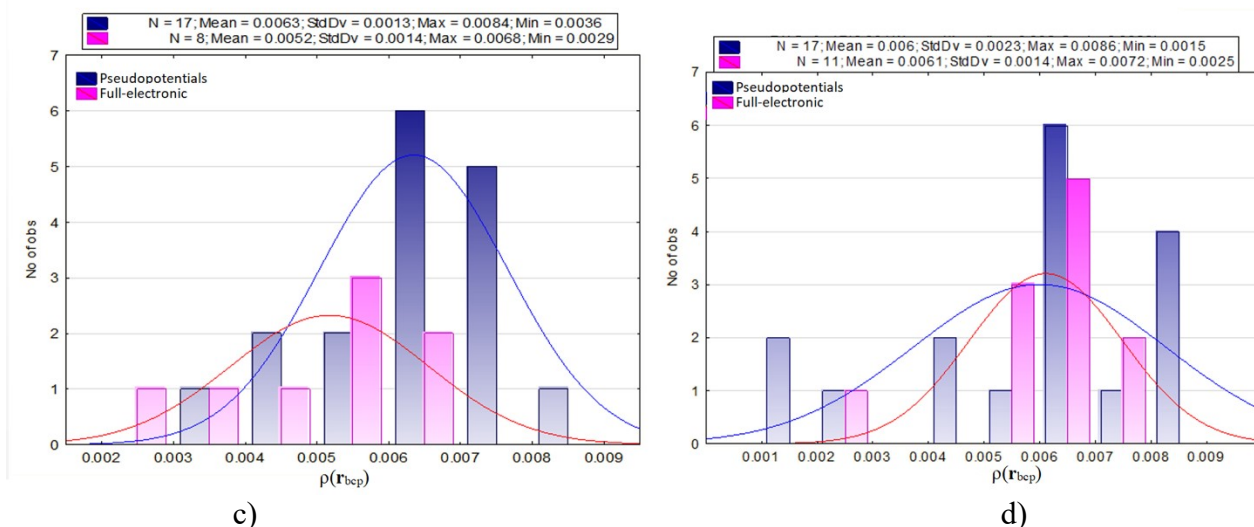

**Figure S7.** Distributions of the values of electron density at bcp  $C_g \dots H$  a) for the graphene-DGEBA models with vacancy (three relatively strongest bonds formed by  $CH_2$  or  $CH_3$  groups DGEBA with  $C_g$  belonging to the edge of defect are in the right); b) for models with Si-defect. Distributions of electron density at bcp for  $C_g \dots O$  bonds: c) in systems “DGEBA – graphene with vacancy”; d) in systems “DGEBA – graphene with Si-defect”

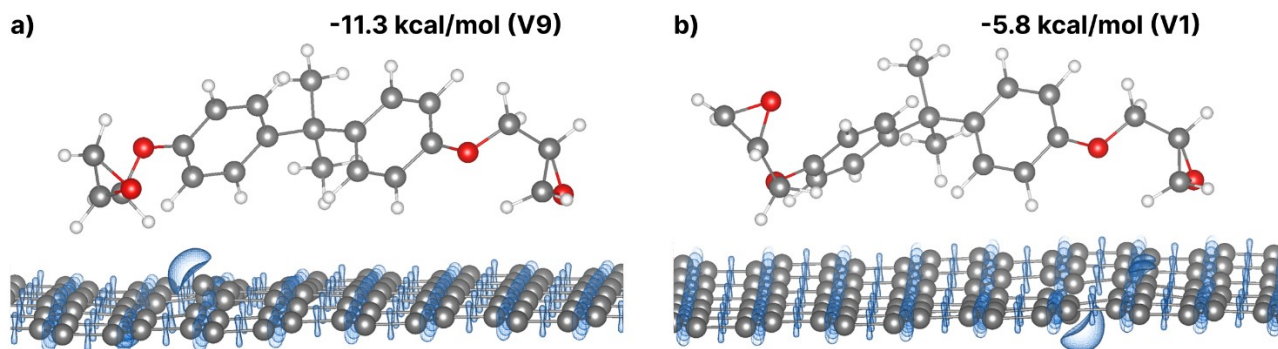

**Figure S8.** The fermionic potential,  $v_f(r)$ , distribution (-0.25 a.u.) in the graphene layer of the graphene-DGEBA systems with a vacancy (V9 and V1 systems). The  $\Delta E_{int} = E_{int}(\text{system}) - E_{int}(\text{ideal graphene})$  is shown on the each frame.

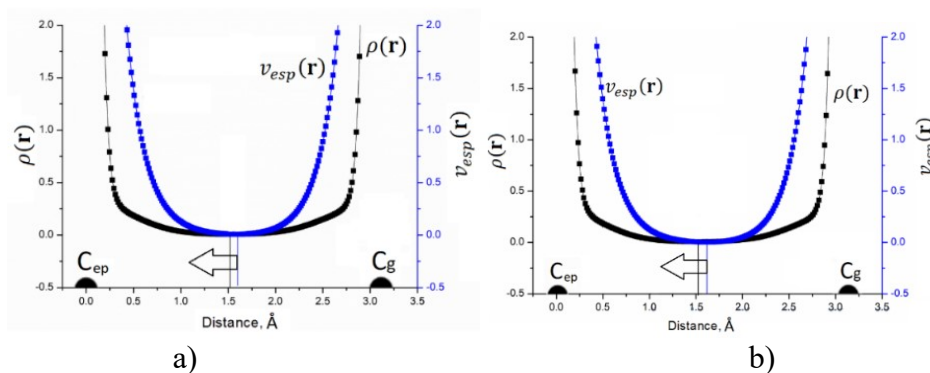

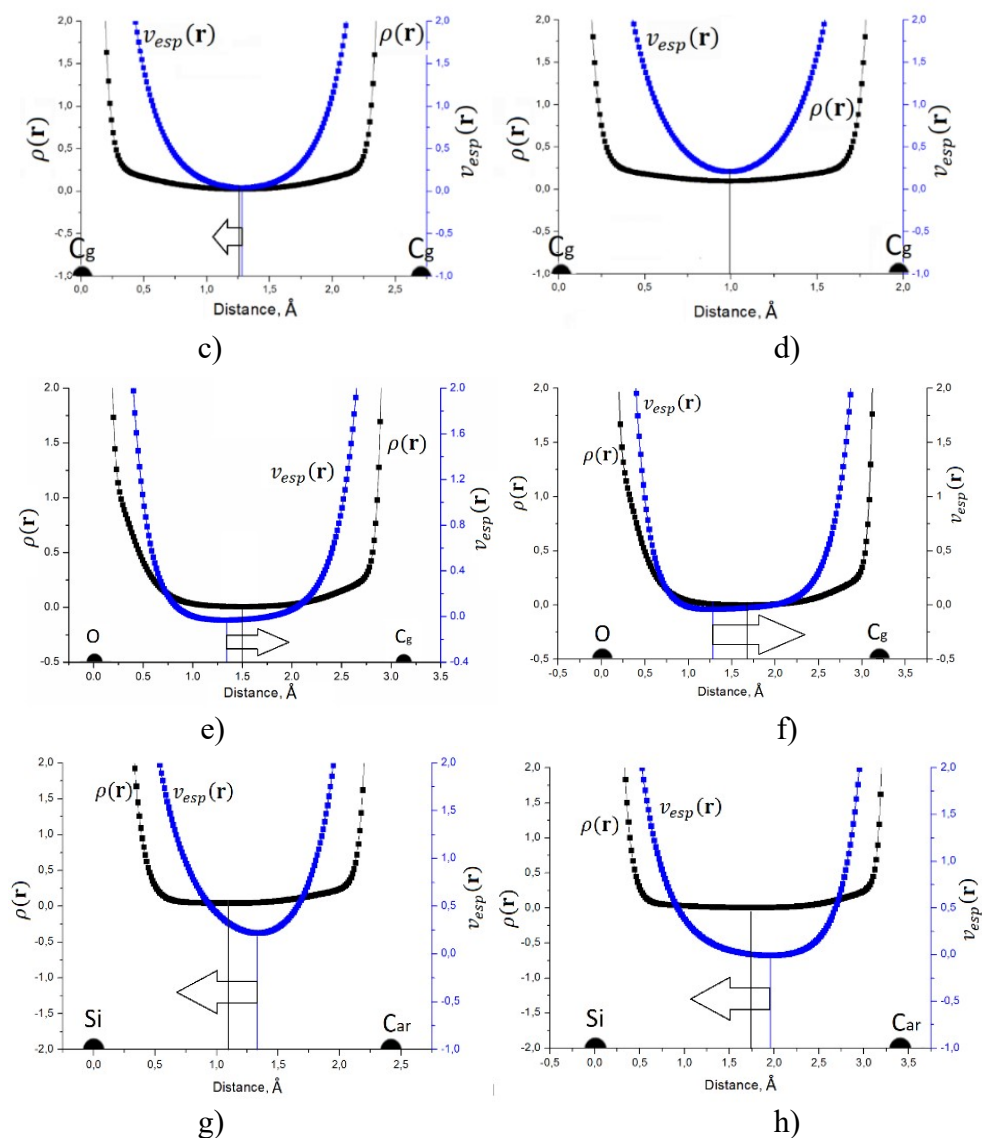

**Figure S9.** Superposition of the boundaries of atomic basins in electrostatic potential and electron density along the line of a)  $C_g \dots C_{ep}$  interaction ( $C_{ep}$  in DGEBA near the epoxy O) in V4 model; b)  $C_g \dots C_{ep}$  interaction ( $C_{ep}$  in DGEBA near the epoxy O) in S7 model; c) the polar intralayer  $C_g \dots C_g$  bond for graphene with the vacancy; d) the nonpolar intralayer  $C_g \dots C_g$  bond for graphene with the vacancy; e) tetrel bond  $C_g \dots O$  (epoxy oxygen) for DGEBA and defect-free graphene; f) tetrel bond  $C_g \dots O$  (ether oxygen) for DGEBA and defect-free graphene; g) relatively strong  $Si \dots C_g$  interaction in Si-defect (S7 model); h) weak  $Si \dots C_g$  interaction in Si-defect (S2 model).

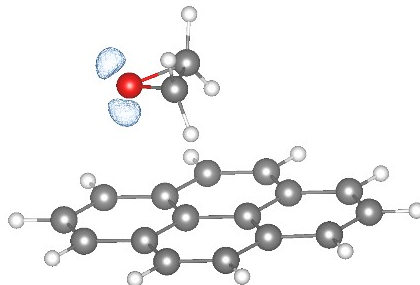

**Figure S10.** Fermionic potential -0.200 a.u. isosurface for the O atom in the isolated complex of ethylene oxide and four condensed benzene rings.



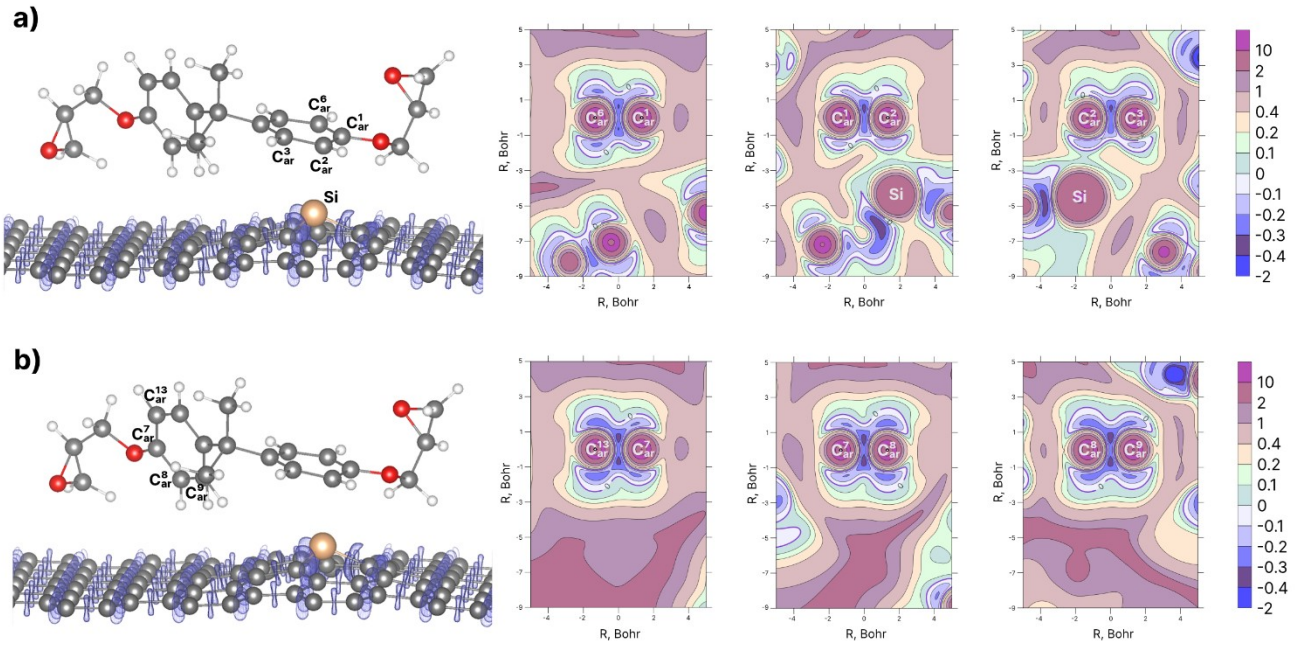

**Figure S11.** The fermionic potential,  $v_f(r)$ , in the graphene-DGEBA system (model S7). 3D distribution is shown only for the graphene layer (-0.25 a.u. isosurface), while 2D maps are depicted  $v_f(r)$  in the planes of the DGEBA aryl rings. All of them include  $C_{ar}-C_{ar}$  bonds and are orthogonal to the plane of the corresponding aryl ring.

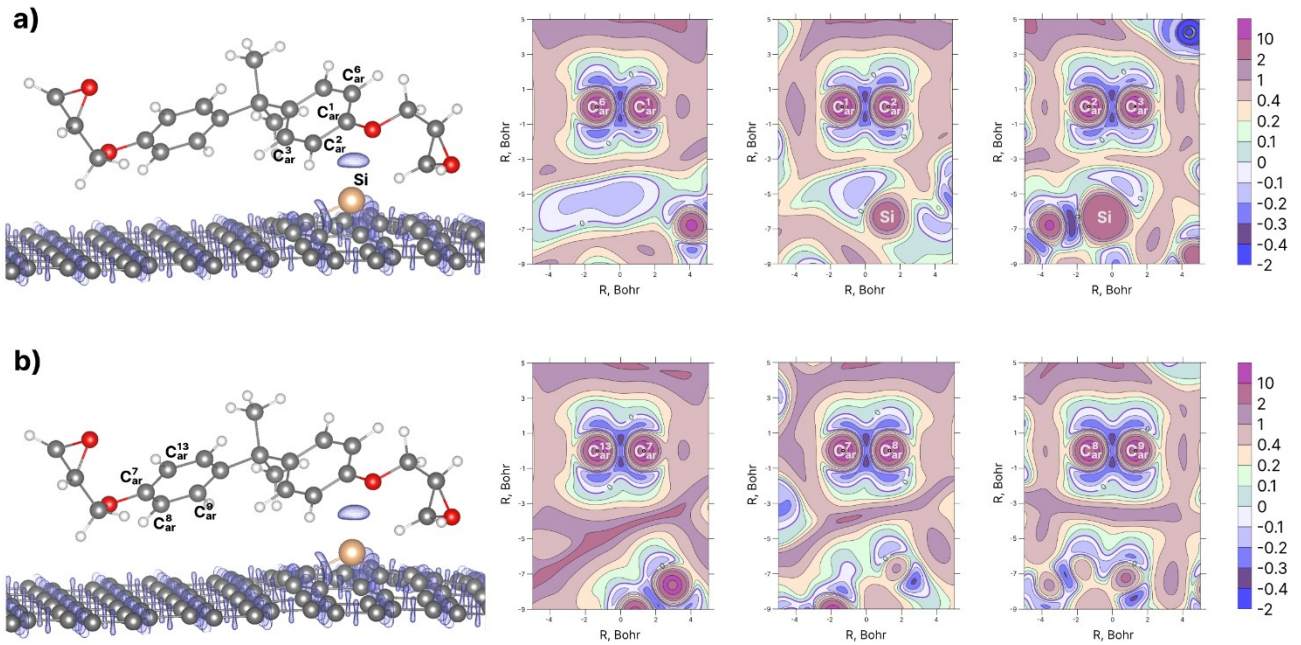

**Figure S12.** The fermionic potential,  $v_f(r)$ , in the graphene-DGEBA system (model S2). 3D distribution is shown only for the graphene layer (-0.25 a.u. isosurface), while 2D maps are depicted  $v_f(r)$  in the planes of the DGEBA aryl rings. All of them include  $C_{ar}-C_{ar}$  bonds and are orthogonal to the plane of the corresponding aryl ring.



**Table S1.** The relative energy ( $E_{\text{rel}}$ , kcal/mol) and the interaction energy ( $E_{\text{int}}$ , kcal/mol) for the systems of DGEBA and graphene with a vacancy (V-models), and with a Si-defect (S-models).

|             | $E_{\text{rel}}$             | $E_{\text{int}}$ | $E_{\text{int}}$<br>+BSSE | $E_{\text{int}}$<br>noRelax<br>+BSSE | $E_{\text{int}}$<br>noRelax | $E_{\text{rel}}$             | $E_{\text{int}}$ |
|-------------|------------------------------|------------------|---------------------------|--------------------------------------|-----------------------------|------------------------------|------------------|
|             | Pseudopotential calculations |                  |                           |                                      |                             | Full-electronic calculations |                  |
| Defect-free | -                            | -35.1            | -25.9                     | -26.6                                | -35.7                       | -                            | -13.7            |
| V1          | 3.9                          | -34.4            | -25.2                     | -26.2                                | -35.3                       | 5.5                          | -19.5            |
| V2          | 3.0                          | -35.3            | -25.7                     | -26.5                                | -36.1                       | 4.4                          | -20.5            |
| V3          | 3.3                          | -34.9            | -25.3                     | -26.5                                | -36.1                       | 5.1                          | -19.8            |
| V4          | 3.5                          | -34.8            | -25.7                     | -26.4                                | -35.6                       | 3.7                          | -21.3            |
| V5          | 3.1                          | -35.2            | -25.7                     | -26.8                                | -36.3                       | 4.2                          | -20.8            |
| V6          | 4.0                          | -34.3            | -25.0                     | -26.5                                | -35.8                       | 5.2                          | -19.8            |
| V7          | 3.3                          | -35.0            | -25.6                     | -26.6                                | -36.1                       | 4.7                          | -20.2            |
| V8          | 3.0                          | -35.3            | -26.2                     | -27.1                                | -36.1                       | 2.2                          | -22.8            |
| V9          | 0.0                          | -38.3            | -27.8                     | -28.8                                | -39.2                       | 0.0                          | -25.0            |
| S1          | 8.3                          | -35.2            | -25.8                     | -26.1                                | -35.4                       | 5.6                          | -20.3            |
| S2          | 5.1                          | -38.3            | -27.7                     | -29.6                                | -40.2                       | 4.1                          | -21.7            |
| S3          | 5.7                          | -37.8            | -27.9                     | -28.2                                | -38.1                       | 4.1                          | -21.8            |
| S4          | 8.0                          | -35.5            | -26.4                     | -26.9                                | -36.0                       | 6.2                          | -19.7            |
| S5          | 6.5                          | -36.9            | -27.3                     | -27.7                                | -37.3                       | 4.8                          | -21.1            |
| S6          | 6.3                          | -37.2            | -27.4                     | -27.7                                | -37.5                       | 3.7                          | -22.2            |
| S7          | 0.0                          | -43.4            | -32.6                     | -39.0                                | -49.8                       | 0.0                          | -25.8            |
| S8          | 8.4                          | -35.0            | -25.4                     | -27.6                                | -37.2                       | 3.7                          | -22.2            |
| S9          | 6.6                          | -36.8            | -26.8                     | -28.4                                | -38.4                       | 3.6                          | -22.3            |

**Table S2.** The bond length and the properties of electron density at the bond critical points for noncovalent bonds in the systems of DGEBA and graphene with a vacancy. (The bonds in italics refer to intralayer bonds).

| Model      | Noncovalent bond | Bond Length, Å | Electron density, $\rho(\text{rbcp})$ , a.u. | Laplacian of electron density, $\nabla^2\rho(\text{rbcp})$ , a.u. | Kinetic energy density, $g(\text{rbcp})$ , a.u. | Potential energy density, $v(\text{rbcp})$ , a.u. |
|------------|------------------|----------------|----------------------------------------------|-------------------------------------------------------------------|-------------------------------------------------|---------------------------------------------------|
| V1         | H10...C66        | 2.663          | 0.008                                        | 0.029                                                             | 0.006                                           | -0.004                                            |
|            | C86...O166       | 3.449          | 0.003                                        | 0.017                                                             | 0.003                                           | -0.002                                            |
|            | H17...C105       | 2.615          | 0.009                                        | 0.032                                                             | 0.007                                           | -0.005                                            |
|            | H5...C58         | 2.992          | 0.004                                        | 0.018                                                             | 0.003                                           | -0.002                                            |
|            | H6...C59         | 2.706          | 0.007                                        | 0.026                                                             | 0.005                                           | -0.004                                            |
|            | H4...C80         | 2.822          | 0.006                                        | 0.023                                                             | 0.004                                           | -0.003                                            |
|            | H9...C81         | 2.682          | 0.008                                        | 0.028                                                             | 0.006                                           | -0.004                                            |
|            | H22...C91        | 2.588          | 0.009                                        | 0.035                                                             | 0.007                                           | -0.005                                            |
|            | C83...O167       | 3.138          | 0.006                                        | 0.026                                                             | 0.005                                           | -0.004                                            |
|            | C91...C101       | 2.481          | 0.033                                        | 0.066                                                             | 0.016                                           | -0.016                                            |
| C91...C110 | 1.893            | 0.119          | -0.088                                       | 0.027                                                             | -0.076                                          |                                                   |

|            |             |       |       |        |        |        |
|------------|-------------|-------|-------|--------|--------|--------|
|            | C101...C110 | 2.496 | 0.032 | 0.066  | 0.016  | -0.015 |
| V2         | H17...C85   | 2.800 | 0.006 | 0.025  | 0.005  | -0.003 |
|            | H10...C57   | 2.612 | 0.009 | 0.033  | 0.007  | -0.005 |
|            | H17...C86   | 2.809 | 0.006 | 0.028  | 0.005  | -0.004 |
|            | H5...C47    | 2.982 | 0.004 | 0.017  | 0.003  | -0.002 |
|            | H6...C59    | 2.677 | 0.008 | 0.026  | 0.005  | -0.004 |
|            | H4...C79    | 2.767 | 0.006 | 0.023  | 0.004  | -0.003 |
|            | H9...C89    | 2.737 | 0.007 | 0.024  | 0.005  | -0.003 |
|            | C110...C163 | 3.084 | 0.008 | 0.034  | 0.007  | -0.005 |
|            | C81...C100  | 1.883 | 0.121 | -0.097 | 0.027  | -0.079 |
|            | C81...C89   | 2.495 | 0.032 | 0.067  | 0.016  | -0.015 |
| C100...C89 | 2.487       | 0.032 | 0.067 | 0.016  | -0.016 |        |
| V3         | H17...C95   | 2.761 | 0.007 | 0.025  | 0.005  | -0.004 |
|            | C85...O166  | 3.267 | 0.005 | 0.024  | 0.005  | -0.003 |
|            | H10...C57   | 2.656 | 0.008 | 0.030  | 0.006  | -0.005 |
|            | H5...C48    | 3.101 | 0.003 | 0.013  | 0.002  | -0.001 |
|            | H6...C60    | 2.547 | 0.010 | 0.030  | 0.006  | -0.005 |
|            | H4...C88    | 2.859 | 0.005 | 0.023  | 0.004  | -0.003 |
|            | H9...C99    | 2.670 | 0.008 | 0.031  | 0.006  | -0.005 |
|            | H22...C121  | 2.714 | 0.008 | 0.032  | 0.006  | -0.004 |
|            | H21...C131  | 3.065 | 0.003 | 0.015  | 0.003  | -0.002 |
|            | C69...C88   | 1.870 | 0.124 | -0.108 | 0.028  | -0.083 |
|            | C69...C79   | 2.494 | 0.032 | 0.067  | 0.016  | -0.015 |
| C88...C79  | 2.483       | 0.033 | 0.067 | 0.016  | -0.016 |        |
| V4         | H17...C95   | 2.673 | 0.008 | 0.028  | 0.006  | -0.004 |
|            | C85...O166  | 3.363 | 0.004 | 0.021  | 0.004  | -0.003 |
|            | H10...C65   | 2.582 | 0.009 | 0.034  | 0.007  | -0.005 |
|            | H5...C58    | 3.054 | 0.004 | 0.017  | 0.003  | -0.002 |
|            | H4...C78    | 2.873 | 0.005 | 0.021  | 0.004  | -0.003 |
|            | H6...C59    | 2.395 | 0.016 | 0.038  | 0.009  | -0.009 |
|            | H9...C88    | 2.611 | 0.009 | 0.033  | 0.007  | -0.005 |
|            | C163...C110 | 3.087 | 0.007 | 0.032  | 0.006  | -0.005 |
|            | C59...C48   | 2.507 | 0.031 | 0.066  | 0.016  | -0.015 |
|            | C67...C48   | 1.885 | 0.122 | -0.099 | 0.027  | -0.079 |
| C59...C67  | 2.506       | 0.031 | 0.066 | 0.016  | -0.015 |        |
| V5         | H17...C95   | 2.729 | 0.007 | 0.026  | 0.005  | -0.004 |
|            | C85...O166  | 3.224 | 0.005 | 0.025  | 0.005  | -0.004 |
|            | H10...C57   | 2.664 | 0.008 | 0.029  | 0.006  | -0.004 |
|            | C77...C152  | 3.241 | 0.006 | 0.027  | 0.005  | -0.003 |
|            | H5...C48    | 2.894 | 0.005 | 0.019  | 0.003  | -0.002 |
|            | H4...C78    | 2.790 | 0.006 | 0.023  | 0.004  | -0.003 |
|            | H6...C59    | 2.643 | 0.009 | 0.029  | 0.006  | -0.005 |
|            | H9...C99    | 2.657 | 0.008 | 0.030  | 0.006  | -0.004 |
|            | H22...C121  | 2.728 | 0.007 | 0.032  | 0.006  | -0.004 |
|            | H21...C131  | 3.077 | 0.003 | 0.015  | 0.003  | -0.002 |
|            | C59...C78   | 1.869 | 0.125 | -0.109 | 0.028  | -0.083 |

|             |             |            |       |        |       |        |
|-------------|-------------|------------|-------|--------|-------|--------|
|             | C59...C67   | 2.484      | 0.033 | 0.067  | 0.016 | -0.016 |
|             | C78...C67   | 2.485      | 0.033 | 0.067  | 0.016 | -0.016 |
| V6          | H17...C95   | 2.726      | 0.007 | 0.026  | 0.005 | -0.004 |
|             | H10...C66   | 2.778      | 0.006 | 0.026  | 0.005 | -0.003 |
|             | H18...C96   | 2.866      | 0.005 | 0.024  | 0.004 | -0.003 |
|             | C152...C77  | 3.129      | 0.007 | 0.030  | 0.006 | -0.004 |
|             | H5...C58    | 2.794      | 0.006 | 0.025  | 0.005 | -0.003 |
|             | H4...C87    | 2.842      | 0.005 | 0.019  | 0.004 | -0.002 |
|             | H6...C59    | 2.653      | 0.008 | 0.030  | 0.006 | -0.005 |
|             | H9...C99    | 2.649      | 0.008 | 0.030  | 0.006 | -0.005 |
|             | H22...C121  | 2.733      | 0.007 | 0.032  | 0.006 | -0.004 |
|             | C110...O167 | 3.082      | 0.007 | 0.032  | 0.006 | -0.005 |
|             | C58...C67   | 2.490      | 0.032 | 0.067  | 0.016 | -0.015 |
|             | C58...C77   | 1.872      | 0.124 | -0.107 | 0.028 | -0.082 |
|             | C67...C77   | 2.487      | 0.032 | 0.067  | 0.016 | -0.016 |
|             | V7          | H17...C104 | 2.647 | 0.008  | 0.031 | 0.006  |
| O166...C105 |             | 3.232      | 0.005 | 0.026  | 0.005 | -0.004 |
| H10...C85   |             | 2.751      | 0.007 | 0.027  | 0.005 | -0.004 |
| H5...C67    |             | 2.731      | 0.007 | 0.028  | 0.005 | -0.004 |
| H4...C87    |             | 2.792      | 0.006 | 0.022  | 0.004 | -0.003 |
| H6...C68    |             | 2.683      | 0.008 | 0.026  | 0.005 | -0.004 |
| H9...C99    |             | 2.637      | 0.009 | 0.031  | 0.006 | -0.005 |
| H22...C121  |             | 2.734      | 0.007 | 0.031  | 0.006 | -0.004 |
| C67...C86   |             | 1.868      | 0.125 | -0.111 | 0.028 | -0.084 |
| C67...C77   |             | 2.485      | 0.033 | 0.067  | 0.016 | -0.016 |
| C77...C86   |             | 2.488      | 0.032 | 0.067  | 0.016 | -0.015 |
| V8          | H17...C85   | 2.311      | 0.019 | 0.042  | 0.011 | -0.012 |
|             | H10...C57   | 2.690      | 0.008 | 0.029  | 0.006 | -0.004 |
|             | H5...C47    | 2.945      | 0.004 | 0.018  | 0.003 | -0.002 |
|             | H6...C40    | 2.816      | 0.006 | 0.024  | 0.005 | -0.003 |
|             | H4...C69    | 2.920      | 0.005 | 0.023  | 0.004 | -0.003 |
|             | H9...C89    | 2.691      | 0.008 | 0.027  | 0.005 | -0.004 |
|             | H22...C101  | 2.730      | 0.007 | 0.028  | 0.005 | -0.004 |
|             | O167...C91  | 3.039      | 0.007 | 0.031  | 0.006 | -0.005 |
|             | C77...C96   | 1.892      | 0.120 | -0.095 | 0.026 | -0.077 |
|             | C77...C85   | 2.518      | 0.030 | 0.066  | 0.015 | -0.014 |
|             | C96...C85   | 2.511      | 0.030 | 0.067  | 0.016 | -0.015 |
| V9          | H4...C98    | 2.968      | 0.004 | 0.017  | 0.003 | -0.002 |
|             | H5...C67    | 2.804      | 0.006 | 0.021  | 0.004 | -0.003 |
|             | H6...C79    | 2.697      | 0.008 | 0.028  | 0.006 | -0.004 |
|             | H9...C108   | 2.763      | 0.007 | 0.025  | 0.005 | -0.003 |
|             | H10...C77   | 2.848      | 0.005 | 0.021  | 0.004 | -0.003 |
|             | H17...C85   | 3.180      | 0.003 | 0.012  | 0.002 | -0.001 |
|             | H18...C97   | 2.380      | 0.016 | 0.038  | 0.010 | -0.010 |
|             | H20...C104  | 2.642      | 0.009 | 0.030  | 0.006 | -0.005 |
|             | H22...C110  | 2.812      | 0.007 | 0.029  | 0.006 | -0.004 |



|  |             |       |       |        |       |        |
|--|-------------|-------|-------|--------|-------|--------|
|  | O167...C111 | 3.068 | 0.007 | 0.031  | 0.006 | -0.005 |
|  | C86...C97   | 2.508 | 0.030 | 0.066  | 0.016 | -0.015 |
|  | C86...C105  | 1.887 | 0.121 | -0.097 | 0.027 | -0.078 |

**Table S3.** The bond length and the properties of electron density at the bond critical points for noncovalent bonds in the systems of DGEBA and Si-defected graphene.

| Model | Noncovalent bond | Bond Length, Å | Electron density, $\rho(\mathbf{r}_{\text{bcp}})$ , a.u. | Laplacian of electron density, $\nabla^2\rho(\mathbf{r}_{\text{bcp}})$ , a.u. | Kinetic energy density, $g(\mathbf{r}_{\text{bcp}})$ , a.u. | Potential energy density, $v(\mathbf{r}_{\text{bcp}})$ , a.u. |
|-------|------------------|----------------|----------------------------------------------------------|-------------------------------------------------------------------------------|-------------------------------------------------------------|---------------------------------------------------------------|
| S1    | H4...C79         | 2.702          | 0.0070                                                   | 0.0247                                                                        | 0.0049                                                      | -0.0035                                                       |
|       | H6...C59         | 2.681          | 0.0076                                                   | 0.0247                                                                        | 0.0050                                                      | -0.0037                                                       |
|       | H9...C89         | 2.608          | 0.0092                                                   | 0.0322                                                                        | 0.0066                                                      | -0.0051                                                       |
|       | H10...C66        | 2.645          | 0.0088                                                   | 0.0316                                                                        | 0.0064                                                      | -0.0049                                                       |
|       | H17...C85        | 2.726          | 0.0071                                                   | 0.0271                                                                        | 0.0053                                                      | -0.0038                                                       |
|       | H21...C132       | 2.862          | 0.0055                                                   | 0.0223                                                                        | 0.0042                                                      | -0.0028                                                       |
|       | C122...H22       | 2.808          | 0.0065                                                   | 0.0290                                                                        | 0.0055                                                      | -0.0037                                                       |
|       | C103...O168      | 3.192          | 0.0052                                                   | 0.0245                                                                        | 0.0049                                                      | -0.0037                                                       |
| S2    | H5...C68         | 2.942          | 0.0043                                                   | 0.0185                                                                        | 0.0033                                                      | -0.0021                                                       |
|       | H6...C80         | 2.640          | 0.0091                                                   | 0.0288                                                                        | 0.0059                                                      | -0.0047                                                       |
|       | H9...C109        | 2.610          | 0.0088                                                   | 0.0335                                                                        | 0.0066                                                      | -0.0049                                                       |
|       | H10...C78        | 2.774          | 0.0073                                                   | 0.0321                                                                        | 0.0061                                                      | -0.0041                                                       |
|       | H17...C96        | 2.636          | 0.0089                                                   | 0.0300                                                                        | 0.0061                                                      | -0.0048                                                       |
|       | H22...C130       | 2.783          | 0.0064                                                   | 0.0247                                                                        | 0.0047                                                      | -0.0032                                                       |
|       | SI90...C152      | 3.391          | 0.0088                                                   | 0.0208                                                                        | 0.0046                                                      | -0.0039                                                       |
|       | C122...O168      | 3.049          | 0.0073                                                   | 0.0318                                                                        | 0.0066                                                      | -0.0053                                                       |
| S3    | H4...C88         | 2.781          | 0.0059                                                   | 0.0214                                                                        | 0.0041                                                      | -0.0028                                                       |
|       | H5...C57         | 2.911          | 0.0047                                                   | 0.0188                                                                        | 0.0034                                                      | -0.0022                                                       |
|       | H6...C67         | 2.634          | 0.0086                                                   | 0.0299                                                                        | 0.0061                                                      | -0.0047                                                       |
|       | H9...C100        | 2.541          | 0.0098                                                   | 0.0316                                                                        | 0.0066                                                      | -0.0054                                                       |
|       | H10...C76        | 2.817          | 0.0060                                                   | 0.0236                                                                        | 0.0045                                                      | -0.0031                                                       |
|       | H17...C105       | 2.572          | 0.0095                                                   | 0.0334                                                                        | 0.0068                                                      | -0.0053                                                       |
|       | C164...C111      | 3.093          | 0.0072                                                   | 0.0325                                                                        | 0.0063                                                      | -0.0045                                                       |
|       | H22...C121       | 2.802          | 0.0060                                                   | 0.0244                                                                        | 0.0046                                                      | -0.0031                                                       |
|       | C77...C153       | 3.158          | 0.0071                                                   | 0.0318                                                                        | 0.0061                                                      | -0.0042                                                       |
|       | C96...O167       | 3.543          | 0.0024                                                   | 0.0154                                                                        | 0.0028                                                      | -0.0017                                                       |
|       | C102...O168      | 3.065          | 0.0071                                                   | 0.0319                                                                        | 0.0066                                                      | -0.0053                                                       |
| S4    | H4...C88         | 2.905          | 0.0047                                                   | 0.0181                                                                        | 0.0033                                                      | -0.0022                                                       |
|       | H5...C58         | 2.943          | 0.0044                                                   | 0.0185                                                                        | 0.0034                                                      | -0.0021                                                       |
|       | H6...C69         | 2.636          | 0.0088                                                   | 0.0349                                                                        | 0.0070                                                      | -0.0052                                                       |
|       | H7...C48         | 3.202          | 0.0028                                                   | 0.0111                                                                        | 0.0020                                                      | -0.0011                                                       |
|       | H9...C100        | 2.736          | 0.0072                                                   | 0.0268                                                                        | 0.0052                                                      | -0.0038                                                       |
|       | H10...C66        | 2.585          | 0.0094                                                   | 0.0339                                                                        | 0.0069                                                      | -0.0053                                                       |
|       | H17...C85        | 2.683          | 0.0079                                                   | 0.0281                                                                        | 0.0056                                                      | -0.0042                                                       |
|       | H18...C97        | 2.973          | 0.0043                                                   | 0.0196                                                                        | 0.0036                                                      | -0.0023                                                       |
|       | H22...C122       | 2.743          | 0.0070                                                   | 0.0298                                                                        | 0.0056                                                      | -0.0038                                                       |

|    |             |       |        |        |        |         |
|----|-------------|-------|--------|--------|--------|---------|
|    | O168...C112 | 3.023 | 0.0075 | 0.0324 | 0.0067 | -0.0054 |
| S5 | H4...C89    | 2.778 | 0.006  | 0.024  | 0.004  | -0.003  |
|    | H5...C48    | 3.024 | 0.003  | 0.014  | 0.002  | -0.001  |
|    | H6...C60    | 2.581 | 0.010  | 0.034  | 0.007  | -0.006  |
|    | H9...C101   | 2.674 | 0.008  | 0.030  | 0.006  | -0.004  |
|    | H10...C57   | 2.581 | 0.010  | 0.035  | 0.007  | -0.006  |
|    | H17...C86   | 2.687 | 0.008  | 0.031  | 0.006  | -0.004  |
|    | H21...C132  | 3.092 | 0.003  | 0.015  | 0.003  | -0.002  |
|    | H22...C122  | 2.701 | 0.007  | 0.029  | 0.005  | -0.004  |
|    | C77...O167  | 3.215 | 0.006  | 0.026  | 0.005  | -0.004  |
|    | O168...C112 | 3.018 | 0.007  | 0.031  | 0.006  | -0.005  |
| S6 | H4...C80    | 2.781 | 0.006  | 0.023  | 0.004  | -0.003  |
|    | H5...C48    | 2.962 | 0.004  | 0.016  | 0.003  | -0.002  |
|    | H6...C60    | 2.513 | 0.011  | 0.034  | 0.007  | -0.006  |
|    | H9...C89    | 2.802 | 0.006  | 0.028  | 0.005  | -0.004  |
|    | H10...C57   | 2.519 | 0.011  | 0.034  | 0.007  | -0.006  |
|    | H17...C85   | 2.598 | 0.009  | 0.033  | 0.007  | -0.005  |
|    | O167...C86  | 3.114 | 0.007  | 0.029  | 0.006  | -0.005  |
|    | H22...C122  | 2.718 | 0.008  | 0.032  | 0.006  | -0.004  |
|    | O168...C111 | 3.101 | 0.007  | 0.032  | 0.006  | -0.005  |
| S7 | H4...C99    | 2.651 | 0.009  | 0.029  | 0.006  | -0.005  |
|    | H6...C79    | 2.698 | 0.008  | 0.025  | 0.005  | -0.004  |
|    | H9...C109   | 2.486 | 0.011  | 0.035  | 0.008  | -0.006  |
|    | SI78...C153 | 2.392 | 0.046  | -0.005 | 0.013  | -0.027  |
|    | H17...C85   | 2.754 | 0.007  | 0.026  | 0.005  | -0.003  |
|    | H18...C97   | 2.625 | 0.009  | 0.032  | 0.006  | -0.005  |
|    | C164...C131 | 3.116 | 0.007  | 0.030  | 0.006  | -0.004  |
| S8 | H4...C80    | 2.900 | 0.005  | 0.020  | 0.004  | -0.002  |
|    | H5...C67    | 2.955 | 0.005  | 0.022  | 0.004  | -0.003  |
|    | H6...C59    | 2.651 | 0.009  | 0.029  | 0.006  | -0.005  |
|    | H9...C100   | 2.709 | 0.008  | 0.030  | 0.006  | -0.004  |
|    | H10...C66   | 2.810 | 0.006  | 0.022  | 0.004  | -0.003  |
|    | H17...C96   | 2.611 | 0.009  | 0.031  | 0.006  | -0.005  |
|    | H18...C97   | 2.695 | 0.008  | 0.030  | 0.006  | -0.004  |
|    | H20...C117  | 2.838 | 0.005  | 0.023  | 0.004  | -0.003  |
|    | H22...C122  | 2.754 | 0.007  | 0.032  | 0.006  | -0.004  |
| S9 | H4...C80    | 2.872 | 0.005  | 0.022  | 0.004  | -0.003  |
|    | H5...C67    | 3.034 | 0.004  | 0.019  | 0.003  | -0.002  |
|    | H6...C60    | 2.671 | 0.008  | 0.028  | 0.006  | -0.004  |
|    | H9...C110   | 2.762 | 0.007  | 0.024  | 0.005  | -0.003  |
|    | H10...C66   | 2.785 | 0.006  | 0.023  | 0.004  | -0.003  |
|    | H17...C85   | 2.626 | 0.009  | 0.032  | 0.007  | -0.005  |
|    | H18...C98   | 2.809 | 0.006  | 0.021  | 0.004  | -0.003  |
|    | H20...C126  | 2.770 | 0.006  | 0.023  | 0.004  | -0.003  |
|    | H21...C132  | 3.088 | 0.003  | 0.015  | 0.003  | -0.002  |
|    | O168...C112 | 3.069 | 0.007  | 0.031  | 0.006  | -0.005  |

|  |            |       |       |       |       |        |
|--|------------|-------|-------|-------|-------|--------|
|  | H22...C122 | 2.695 | 0.008 | 0.031 | 0.006 | -0.004 |
|--|------------|-------|-------|-------|-------|--------|

**Table S4.** Visual analysis of the mutual orientations for lone electron pairs (LP) of ether ( $O_{et}$ ) and epoxy ( $O_{ep}$ ) oxygen, centres of ( $C_g-C_g$ ) bonds, areas above  $C_g$  atoms in the  $\pi$ -plane,  $\pi(C_g)$ , ring critical points (rcp) in the systems of DGEBA and defected graphene

| Model | Noncovalent bond | Types of orientation                       |                                          |                                            |
|-------|------------------|--------------------------------------------|------------------------------------------|--------------------------------------------|
|       |                  |                                            |                                          |                                            |
| V1    | C86...O166       | $O_{et} \leftrightarrow C_g-C_g$           | $LP(O_{et}) \leftrightarrow C_g-C_g$     |                                            |
| V1    | C83...O167       | $O_{ep} \leftrightarrow C_g-C_g$           | $LP(O_{ep}) \leftrightarrow \text{ring}$ | $LP(O_{ep}) \leftrightarrow \text{ring}^*$ |
| V3    | C85...O166       | $O_{et} \leftrightarrow C_g-C_g$           | $LP(O_{et}) \leftrightarrow \text{rcp}$  |                                            |
| V4    | C85...O166       | $O_{et} \leftrightarrow C_g-C_g$           | $LP(O_{et}) \leftrightarrow \text{ring}$ |                                            |
| V5    | C85...O166       | $O_{et} \leftrightarrow \pi(C_g)$          | $LP(O_{et}) \leftrightarrow C_g-C_g$     |                                            |
| V6    | C110...O167      | $O_{ep} \leftrightarrow \text{ring} (C_g)$ | $LP(O_{ep}) \leftrightarrow \text{ring}$ | $LP(O_{ep}) \leftrightarrow \text{ring}$   |
| V7    | O166...C105      | $O_{et} \leftrightarrow C_g-C_g$           | $LP(O_{et}) \leftrightarrow \text{rcp}$  |                                            |
| V8    | O167...C91       | $O_{ep} \leftrightarrow \text{ring} (C_g)$ | $LP(O_{ep}) \leftrightarrow C_g-C_g$     | $LP(O_{ep}) \leftrightarrow \text{ring}$   |
| V9    | O167...C111      | $O_{ep} \leftrightarrow \text{ring} (C_g)$ | $LP(O_{ep}) \leftrightarrow C_g-C_g$     | $LP(O_{ep}) \leftrightarrow \text{ring}$   |
|       |                  |                                            |                                          |                                            |
| S1    | C103...O168      | $O_{ep} \leftrightarrow \text{ring} (C_g)$ | $LP(O_{ep}) \leftrightarrow C_g-C_g$     | $LP(O_{ep}) \leftrightarrow C_g-Si$        |
| S2    | C122...O168      | $O_{ep} \leftrightarrow \text{ring} (C_g)$ | $LP(O_{ep}) \leftrightarrow C_g-C_g$     | $LP(O_{ep}) \leftrightarrow \pi(C_g)$      |
| S3    | C96...O167       | $O_{et} \leftrightarrow \text{rcp}$        | $LP(O_{et}) \leftrightarrow \text{rcp}$  |                                            |
| S3    | C102...O168      | $O_{ep} \leftrightarrow \text{ring} (C_g)$ | $LP(O_{ep}) \leftrightarrow \text{rcp}$  | $LP(O_{ep}) \leftrightarrow C_g-C_g$       |
| S4    | O168...C112      | $O_{ep} \leftrightarrow C_g-C_g$           | $LP(O_{ep}) \leftrightarrow \text{ring}$ | $LP(O_{ep}) \leftrightarrow \text{ring}$   |
| S5    | C77...O167       | $O_{et} \leftrightarrow C_g-C_g$           | $LP(O_{et}) \leftrightarrow \text{rcp}$  |                                            |
| S5    | O168...C112      | $O_{ep} \leftrightarrow \pi(C_g)$          | $LP(O_{ep}) \leftrightarrow C_g-C_g$     | $LP(O_{ep}) \leftrightarrow \text{rcp}$    |
| S6    | O167...C86       | $O_{et} \leftrightarrow C_g-C_g$           | $LP(O_{et}) \leftrightarrow \text{rcp}$  |                                            |
| S6    | O168...C111      | $O_{ep} \leftrightarrow C_g-C_g$           | $LP(O_{ep}) \leftrightarrow \text{ring}$ | $LP(O_{ep}) \leftrightarrow \text{ring}$   |
| S9    | O168...C112      | $O_{ep} \leftrightarrow C_g-C_g$           | $LP(O_{ep}) \leftrightarrow C_g-C_g$     | $LP(O_{ep}) \leftrightarrow \pi(C_g)$      |

\*ring – the case when it is difficult to describe disposition of element, but it is obvious that it hangs near the area of graphene ring, not over the center.
